# Supplementary material
Source: PubMed Central journal article supplement (PMC8315978)
Supplement: jvi.00003-21-s0001.pdf [file jvi.00003-21-s0001.pdf]

**FIG.S1. The FSC: SSC profile and gating parameters.** The flow cytometry data was gated for live cells based on forward and side scatter parameters. The orange represents RG<sup>+</sup> SH-SY5Y cells upon KSHV infection. The grey represents the added uninfected cells as internal control for auto-fluorescence.

**FIG.S2. Single cell soft agar cloning of uninfected, GFP<sup>+</sup> and RG<sup>+</sup> SH-SY5Y infected cells.** (A) Single cells of the uninfected control (NC), GFP<sup>+</sup> and RG<sup>+</sup> cells were seeded in soft agar and pictures were taken at day 12 after seeding to show the number of clones formed by each type of cells. (B) The number of clones for each of the three groups were counted, and the numbers are shown in the Y-axis.

**FIG.S3. Significantly regulated cellular genes exclusively in an infected population.** Gene expression levels are illustrated in the log<sub>2</sub> scale range from white (0) to dark red (higher than 10) and fold changes are in the log<sub>2</sub> scale range from dark blue (less than 12) to dark red (greater than 12). (A) Significantly up-regulated genes uniquely expressed in the RG<sup>+</sup> infected cell population. (B) Significantly down regulated genes expressed in the RG<sup>+</sup> infected cell population. (C) Continuation of part B. (D) Significant up-regulated genes uniquely expressed in the GFP<sup>+</sup> infected cell population. (E) Significantly downregulated genes expressed in the RG<sup>+</sup> infected cell population.

**FIG.S4. Significantly regulated cellular genes among GFP<sup>+</sup> and RG<sup>+</sup> infected cell populations.** Genes expression levels are illustrated in the log<sub>2</sub> scale range from white (0) to dark red (higher than 10) and fold changes (GFP<sup>+</sup>/NC and RG<sup>+</sup>/NC) are in the log<sub>2</sub> scale range from dark blue (less than 12) to dark red (greater than 12). (A) Significantly up-regulated genes expressed in both infected populations. (B) Continuation of part A. (C) Significant downregulated genes expressed in both infected populations. (D) Continuation of part C.

**FIG.S5. KEGG pathways involved in the KSHV infection across two groups of GFP<sup>+</sup> and RG<sup>+</sup> infected cell populations.** (A)

Venn diagram showing KEGG intersected pathways across the GFP<sup>+</sup> and RG<sup>+</sup> infected cells. (B) KEGG pathways associated with the GFP<sup>+</sup> and RG<sup>+</sup> cell populations, and individually or common pathways shared by both RG<sup>+</sup> and GFP<sup>+</sup> infected cell populations.

**FIG.S6. Comparison of significant regulated genes in GFP<sup>+</sup> and RG<sup>+</sup> population with the significantly regulated genes from**

**the infected TIME cell.** (A) The number of common significant regulated genes between each group. (B) The 44 common genes across all groups that have more log<sub>2</sub> fold or more changes. (C) The fold changes of 27 genes that were shared between two cell types.

Thirteen significant regulated genes were found in common between TIME and GFP<sup>+</sup>, and 14 genes between RG<sup>+</sup> and TIME.

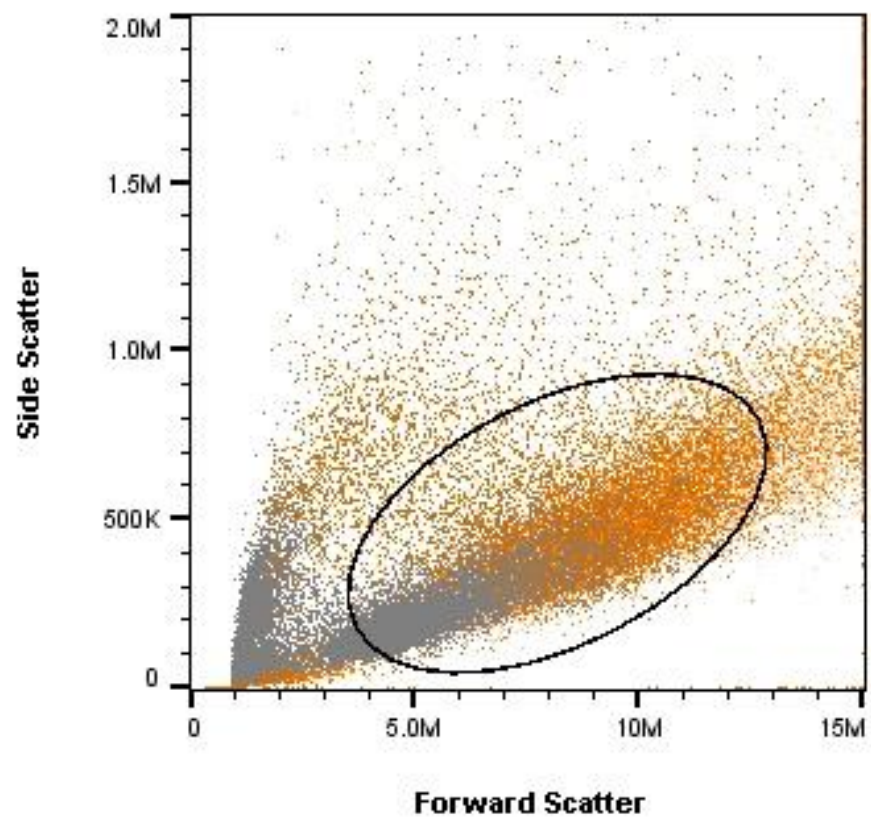

|   | Sample Name      | Subset Name | Count | \$DATE      |
|---|------------------|-------------|-------|-------------|
| ■ | B01 negative.fcs | Ungated     | 14304 | 22-MAR-2017 |
| ■ | B05 RG.fcs       | Ungated     | 8785  | 10-MAR-2017 |
| ■ | B05 RG.fcs       | Ungated     | 16734 | 13-MAR-2017 |
| ■ | B05 RG.fcs       | Ungated     | 16577 | 16-MAR-2017 |
| ■ | B05 RG.fcs       | Ungated     | 13199 | 22-MAR-2017 |

Fig.S1

**A**

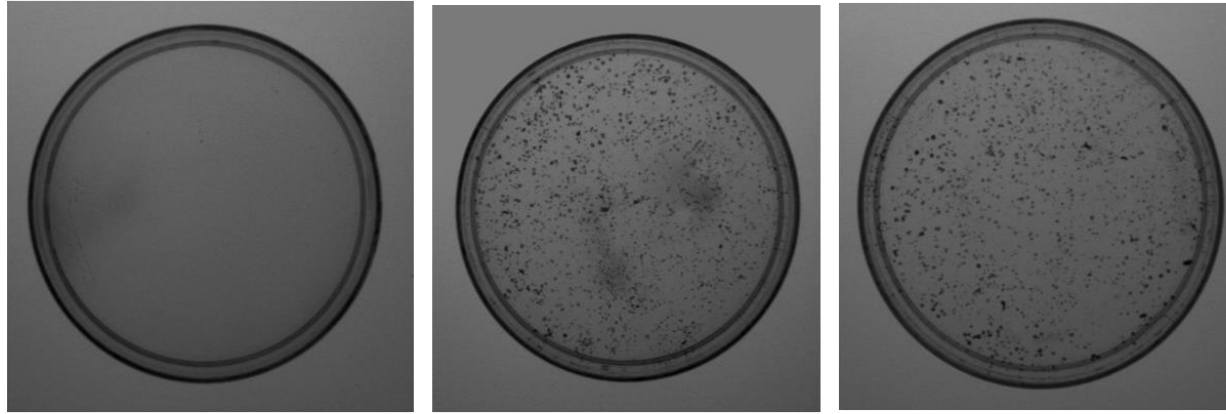

**NC**

**GFP+**

**RG+**

**B**

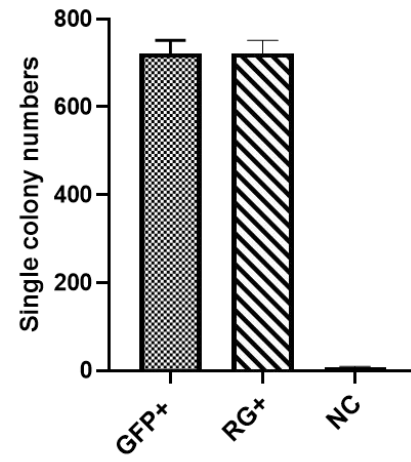

**Fig.S2**

**A**

| GeneID        | Expression levels<br>log <sub>2</sub> (FPKM <sub>s</sub> +1) |        |       | Fold<br>Change<br>(log <sub>2</sub> )<br>RG+/NC |
|---------------|--------------------------------------------------------------|--------|-------|-------------------------------------------------|
|               | NC                                                           | RG+    | NC    |                                                 |
| RP6-24A23.3   |                                                              | 0      | 3.117 | Inf                                             |
| USP43         |                                                              | 0      | 2.466 | Inf                                             |
| MICB          |                                                              | 0      | 2.160 | Inf                                             |
| HOXB13        |                                                              | 0      | 2.073 | Inf                                             |
| APOBEC3B      |                                                              | 0      | 1.953 | Inf                                             |
| NKX6-1        |                                                              | 0      | 1.947 | Inf                                             |
| BARX2         |                                                              | 0      | 1.840 | Inf                                             |
| WNT10B        |                                                              | 0      | 1.594 | Inf                                             |
| USHIC         |                                                              | 0      | 1.534 | Inf                                             |
| RASGEF1B      |                                                              | 0      | 1.467 | Inf                                             |
| LTK           |                                                              | 0      | 1.457 | Inf                                             |
| SP9           |                                                              | 0      | 1.456 | Inf                                             |
| SIM1          |                                                              | 0      | 1.423 | Inf                                             |
| LG12          |                                                              | 0      | 1.407 | Inf                                             |
| EMX2OS        |                                                              | 0      | 1.267 | Inf                                             |
| SOX21         |                                                              | 0      | 1.229 | Inf                                             |
| INHBB         |                                                              | 0      | 1.168 | Inf                                             |
| EFEMP1        |                                                              | 0      | 1.130 | Inf                                             |
| RP11-138J23.1 |                                                              | 0      | 1.097 | Inf                                             |
| PAX2          |                                                              | 0      | 1.094 | Inf                                             |
| AC073043.1    | 0.015                                                        | 1.303  | 7.158 |                                                 |
| NLR5          | 0.305                                                        | 2.169  | 3.893 |                                                 |
| MI-NDS        | 8.621                                                        | 10.422 | 1.804 |                                                 |

**B**

| GeneID         | Expression levels<br>log <sub>2</sub> (FPKM <sub>s</sub> +1) |       |    | Fold<br>Change<br>(log <sub>2</sub> )<br>RG+/NC |
|----------------|--------------------------------------------------------------|-------|----|-------------------------------------------------|
|                | NC                                                           | RG+   | NC |                                                 |
| TAGLN3         |                                                              | 5.832 | 0  | -Inf                                            |
| DTX3           |                                                              | 5.745 | 0  | -Inf                                            |
| ACTL6B         |                                                              | 5.194 | 0  | -Inf                                            |
| FAM155A        |                                                              | 4.659 | 0  | -Inf                                            |
| ZNF43          |                                                              | 4.214 | 0  | -Inf                                            |
| TMEM119        |                                                              | 4.209 | 0  | -Inf                                            |
| CSRP1          |                                                              | 4.189 | 0  | -Inf                                            |
| SEZ6L          |                                                              | 3.881 | 0  | -Inf                                            |
| NAT16          |                                                              | 3.783 | 0  | -Inf                                            |
| ARMCX1         |                                                              | 3.683 | 0  | -Inf                                            |
| RP11-197K6.1   |                                                              | 3.679 | 0  | -Inf                                            |
| LINC00599      |                                                              | 3.649 | 0  | -Inf                                            |
| RP11-161D15.3  |                                                              | 3.487 | 0  | -Inf                                            |
| MAATS1         |                                                              | 3.459 | 0  | -Inf                                            |
| VAT1L          |                                                              | 3.406 | 0  | -Inf                                            |
| CTC-338M12.9   |                                                              | 3.326 | 0  | -Inf                                            |
| RP1-310O13.12  |                                                              | 3.185 | 0  | -Inf                                            |
| DOCK10         |                                                              | 3.155 | 0  | -Inf                                            |
| SERPINA5       |                                                              | 3.080 | 0  | -Inf                                            |
| PLXNA4         |                                                              | 3.044 | 0  | -Inf                                            |
| RP11-166D19.1  |                                                              | 3.000 | 0  | -Inf                                            |
| ZFP82          |                                                              | 2.985 | 0  | -Inf                                            |
| C7             |                                                              | 2.967 | 0  | -Inf                                            |
| AC012354.6     |                                                              | 2.861 | 0  | -Inf                                            |
| PDE6B          |                                                              | 2.758 | 0  | -Inf                                            |
| SRRM4          |                                                              | 2.727 | 0  | -Inf                                            |
| FSTL5          |                                                              | 2.695 | 0  | -Inf                                            |
| CTD-2335A18.1  |                                                              | 2.637 | 0  | -Inf                                            |
| FAM111B        |                                                              | 2.627 | 0  | -Inf                                            |
| MIR137HG       |                                                              | 2.532 | 0  | -Inf                                            |
| ZNF665         |                                                              | 2.483 | 0  | -Inf                                            |
| SCRT1          |                                                              | 2.441 | 0  | -Inf                                            |
| PEAR1          |                                                              | 2.322 | 0  | -Inf                                            |
| ZFP3           |                                                              | 2.281 | 0  | -Inf                                            |
| XKR7           |                                                              | 2.215 | 0  | -Inf                                            |
| LINC00202-2    |                                                              | 2.119 | 0  | -Inf                                            |
| PTH2R          |                                                              | 2.109 | 0  | -Inf                                            |
| AKRIE2         |                                                              | 1.994 | 0  | -Inf                                            |
| CX3CL1         |                                                              | 1.977 | 0  | -Inf                                            |
| GUCA1A         |                                                              | 1.880 | 0  | -Inf                                            |
| CALB1          |                                                              | 1.862 | 0  | -Inf                                            |
| CHRM1          |                                                              | 1.861 | 0  | -Inf                                            |
| SLC1A2         |                                                              | 1.803 | 0  | -Inf                                            |
| ST6GAL2        |                                                              | 1.771 | 0  | -Inf                                            |
| LRFN2          |                                                              | 1.728 | 0  | -Inf                                            |
| CSMD2          |                                                              | 1.657 | 0  | -Inf                                            |
| RP11-1038A11.1 |                                                              | 1.602 | 0  | -Inf                                            |
| PTPRR          |                                                              | 1.426 | 0  | -Inf                                            |
| PCDH9          |                                                              | 1.219 | 0  | -Inf                                            |
| RP11-923H1.6   |                                                              | 1.196 | 0  | -Inf                                            |
| AC092198.1     |                                                              | 1.189 | 0  | -Inf                                            |
| AGAP7          |                                                              | 1.160 | 0  | -Inf                                            |
| GLYATLIP2      |                                                              | 1.154 | 0  | -Inf                                            |
| RP11-161D15.1  |                                                              | 1.066 | 0  | -Inf                                            |

**C**

| GeneID   | Expression levels<br>log <sub>2</sub> (FPKM <sub>s</sub> +1) |       |        | Fold<br>Change<br>(log <sub>2</sub> )<br>RG+/NC |
|----------|--------------------------------------------------------------|-------|--------|-------------------------------------------------|
|          | NC                                                           | RG+   | NC     |                                                 |
| ELMO1    |                                                              | 4.656 | 0.001  | -16.030                                         |
| RIMS2    |                                                              | 3.244 | 0.0004 | -14.859                                         |
| ABCA12   |                                                              | 5.168 | 0.058  | -9.724                                          |
| KCNMA1   |                                                              | 2.280 | 0.014  | -8.650                                          |
| CELF4    |                                                              | 3.455 | 0.098  | -7.141                                          |
| SNAP91   |                                                              | 5.129 | 0.444  | -6.560                                          |
| STRA6    |                                                              | 4.162 | 0.329  | -6.042                                          |
| DUSP4    |                                                              | 5.459 | 0.751  | -5.975                                          |
| MYD88    |                                                              | 3.640 | 0.313  | -5.565                                          |
| PCOLCE   |                                                              | 7.728 | 2.668  | -5.301                                          |
| NREP     |                                                              | 6.905 | 2.012  | -5.293                                          |
| NEFASC   |                                                              | 2.752 | 0.199  | -5.278                                          |
| CNTN1    |                                                              | 6.438 | 2.002  | -4.834                                          |
| GATA2    |                                                              | 8.052 | 3.864  | -4.285                                          |
| MCF2L    |                                                              | 4.555 | 1.139  | -4.227                                          |
| PDE2A    |                                                              | 2.861 | 0.421  | -4.208                                          |
| DPYSL2   |                                                              | 5.904 | 2.111  | -4.148                                          |
| TNFRSF25 |                                                              | 3.748 | 0.823  | -4.014                                          |
| CACNA1G  |                                                              | 1.484 | 0.160  | -3.941                                          |
| GLCCII   |                                                              | 7.399 | 3.971  | -3.515                                          |
| ADAM22   |                                                              | 5.056 | 1.970  | -3.468                                          |
| MLLT6    |                                                              | 5.548 | 2.661  | -3.104                                          |
| LPIN1    |                                                              | 5.594 | 2.775  | -3.017                                          |
| KIF1A    |                                                              | 5.980 | 3.245  | -2.873                                          |
| MYO1B    |                                                              | 6.627 | 4.145  | -2.551                                          |

**D**

| GeneID        | Expression levels<br>log <sub>2</sub> (FPKM <sub>s</sub> +1) |        |       | Fold<br>Change<br>(log <sub>2</sub> )<br>GFP+/NC |
|---------------|--------------------------------------------------------------|--------|-------|--------------------------------------------------|
|               | NC                                                           | GFP+   | NC    |                                                  |
| OCLAD2        |                                                              | 8.363  | 0     | -Inf                                             |
| PFOX2B        |                                                              | 6.107  | 0     | -Inf                                             |
| CPXMI         |                                                              | 5.879  | 0     | -Inf                                             |
| DDC           |                                                              | 5.709  | 0     | -Inf                                             |
| ARMCX2        |                                                              | 4.969  | 0     | -Inf                                             |
| SLC18A3       |                                                              | 4.391  | 0     | -Inf                                             |
| GPX7          |                                                              | 4.311  | 0     | -Inf                                             |
| PDE4B         |                                                              | 4.297  | 0     | -Inf                                             |
| SVOP          |                                                              | 4.133  | 0     | -Inf                                             |
| PLCXD3        |                                                              | 4.120  | 0     | -Inf                                             |
| SGIP1         |                                                              | 4.119  | 0     | -Inf                                             |
| EPMAIP1       |                                                              | 3.835  | 0     | -Inf                                             |
| JAKMIP2       |                                                              | 3.638  | 0     | -Inf                                             |
| PDGFRB        |                                                              | 3.628  | 0     | -Inf                                             |
| ZNF439        |                                                              | 3.484  | 0     | -Inf                                             |
| SLITRK6       |                                                              | 3.151  | 0     | -Inf                                             |
| MGMT          |                                                              | 3.142  | 0     | -Inf                                             |
| RP11-293B20.1 |                                                              | 3.055  | 0     | -Inf                                             |
| LAMP5         |                                                              | 2.994  | 0     | -Inf                                             |
| PCDHB14       |                                                              | 2.635  | 0     | -Inf                                             |
| LINGO2        |                                                              | 2.608  | 0     | -Inf                                             |
| UNC80         |                                                              | 2.433  | 0     | -Inf                                             |
| DNER          |                                                              | 2.289  | 0     | -Inf                                             |
| KCNJ9         |                                                              | 2.218  | 0     | -Inf                                             |
| ZNF844        |                                                              | 2.104  | 0     | -Inf                                             |
| ZNF69         |                                                              | 2.076  | 0     | -Inf                                             |
| CCDC169       |                                                              | 2.062  | 0     | -Inf                                             |
| NPAS4         |                                                              | 2.043  | 0     | -Inf                                             |
| CNTNAP5       |                                                              | 2.002  | 0     | -Inf                                             |
| CACNG2        |                                                              | 1.909  | 0     | -Inf                                             |
| CES4A         |                                                              | 1.906  | 0     | -Inf                                             |
| RP11-764K9.4  |                                                              | 1.867  | 0     | -Inf                                             |
| SHISA9        |                                                              | 1.727  | 0     | -Inf                                             |
| AC073479.1    |                                                              | 1.705  | 0     | -Inf                                             |
| MARCH4        |                                                              | 1.678  | 0     | -Inf                                             |
| RP4-791K14.2  |                                                              | 1.676  | 0     | -Inf                                             |
| Clorf173      |                                                              | 1.633  | 0     | -Inf                                             |
| RP11-553L6.5  |                                                              | 1.536  | 0     | -Inf                                             |
| RP11-461O7.1  |                                                              | 1.320  | 0     | -Inf                                             |
| CNR1          |                                                              | 1.275  | 0     | -Inf                                             |
| LINC00578     |                                                              | 1.249  | 0     | -Inf                                             |
| C2CD2         |                                                              | 1.100  | 0     | -Inf                                             |
| MUC19         |                                                              | 0.959  | 0     | -Inf                                             |
| NRXN1         |                                                              | 2.255  | 0.001 | -11.979                                          |
| MLH1          |                                                              | 4.657  | 0.013 | -11.395                                          |
| PTPRN2        |                                                              | 3.497  | 0.027 | -9.070                                           |
| RGL3          |                                                              | 3.665  | 0.058 | -8.163                                           |
| NES           |                                                              | 6.053  | 1.012 | -6.006                                           |
| EML5          |                                                              | 6.596  | 1.996 | -5.001                                           |
| ZNF704        |                                                              | 6.267  | 2.251 | -4.337                                           |
| CYB561        |                                                              | 6.234  | 2.724 | -3.728                                           |
| MYEF2         |                                                              | 6.396  | 3.042 | -3.523                                           |
| STMN1         |                                                              | 10.765 | 8.303 | -2.466                                           |

**E**

| GeneID      | Expression levels<br>log <sub>2</sub> (FPKM <sub>s</sub> +1) |       |       | Fold<br>Change<br>(log <sub>2</sub> )<br>GFP+/NC |
|-------------|--------------------------------------------------------------|-------|-------|--------------------------------------------------|
|             | NC                                                           | GFP+  | NC    |                                                  |
| GS1-600G8.5 |                                                              | 0     | 3.236 | Inf                                              |
| RP4-792G4.2 |                                                              | 0     | 2.715 | Inf                                              |
| MAFA        |                                                              | 0     | 2.233 | Inf                                              |
| CAV1        |                                                              | 0     | 2.191 | Inf                                              |
| CT4SA5      |                                                              | 0     | 2.159 | Inf                                              |
| HLA-DRB1    |                                                              | 0     | 1.904 | Inf                                              |
| SMPDL3A     |                                                              | 0     | 1.879 | Inf                                              |
| LOXLL-AS1   |                                                              | 0     | 1.863 | Inf                                              |
| AC079135.1  |                                                              | 0     | 1.841 | Inf                                              |
| GYPC        |                                                              | 0     | 1.738 | Inf                                              |
| TFAP2C      |                                                              | 0     | 1.737 | Inf                                              |
| EN1         |                                                              | 0     | 1.605 | Inf                                              |
| NPIPL2      |                                                              | 0     | 1.593 | Inf                                              |
| LHX1        |                                                              | 0     | 1.497 | Inf                                              |
| SALL3       |                                                              | 0     | 1.390 | Inf                                              |
| DOCK8       |                                                              | 0     | 1.366 | Inf                                              |
| CEBPD       |                                                              | 0     | 1.334 | Inf                                              |
| ARMC4       |                                                              | 0     | 1.286 | Inf                                              |
| GIPC3       |                                                              | 0     | 1.145 | Inf                                              |
| TGM2        |                                                              | 0     | 1.098 | Inf                                              |
| LEF1        |                                                              | 0.322 | 3.435 | 5.296                                            |
| HLA-C       |                                                              | 3.044 | 7.462 | 4.596                                            |
| ATPIA1      |                                                              | 5.466 | 7.846 | 2.407                                            |

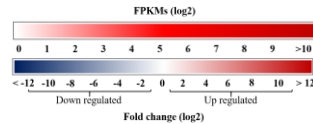**Fig. S3**

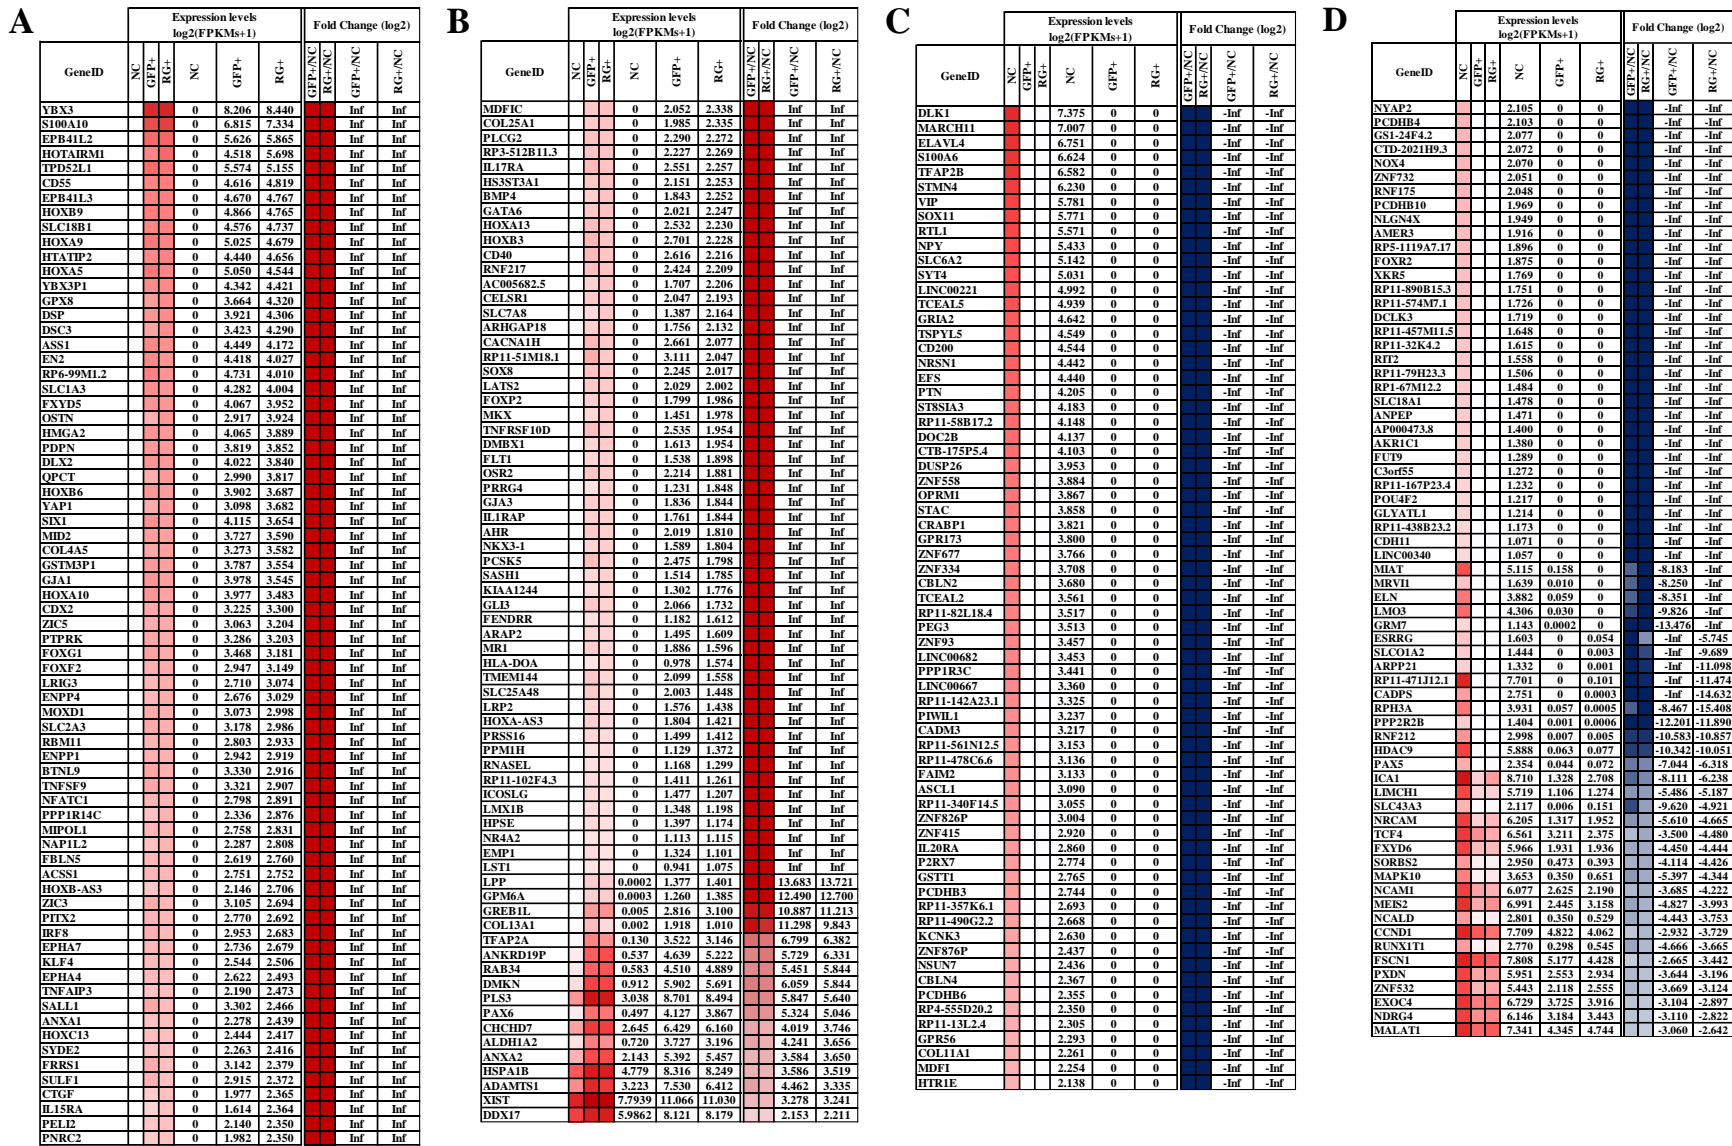

**A**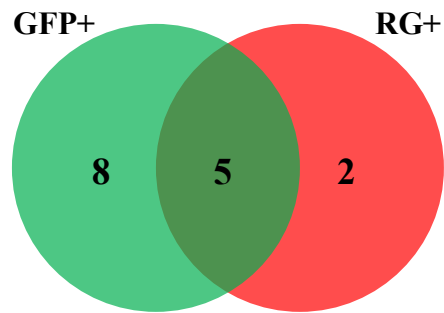**B**

| Samples   | # | KEGG Pathways                                          |
|-----------|---|--------------------------------------------------------|
| GFP+, RG+ | 5 | hsa04390: Hippo signaling pathway                      |
|           |   | hsa04974: Protein digestion and absorption             |
|           |   | hsa04672: Intestinal immune network for IgA production |
|           |   | hsa05202: Transcriptional misregulation in cancer      |
|           |   | hsa04514: Cell adhesion molecules (CAMs)               |
| GFP+      | 8 | hsa05416: Viral myocarditis                            |
|           |   | hsa04728: Dopaminergic synapse                         |
|           |   | hsa05330: Allograft rejection                          |
|           |   | hsa05169: Epstein-Barr virus infection                 |
|           |   | hsa04940: Type I diabetes mellitus                     |
|           |   | hsa05200: Pathways in cancer                           |
|           |   | hsa05320: Autoimmune thyroid disease                   |
|           |   | hsa04024: cAMP signaling pathway                       |
| RG+       | 2 | hsa04060: Cytokine-cytokine receptor interaction       |
|           |   | hsa04925: Aldosterone synthesis and secretion          |

**Fig. S5**

**A**

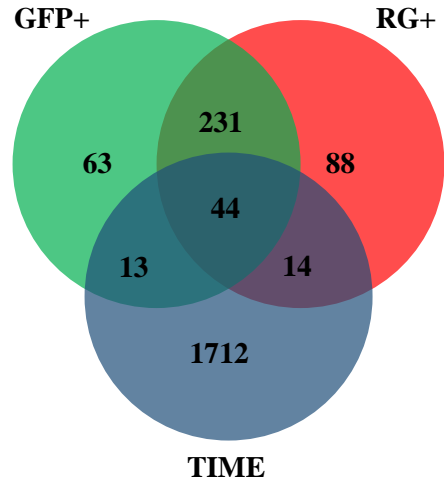

**B**

| GeneID   | Fold Change (log2) |     |      |         |         |        |
|----------|--------------------|-----|------|---------|---------|--------|
|          | GFP+               | RG+ | TIME | GFP+    | RG+     | TIME   |
| ENPP4    |                    |     |      | Inf     | Inf     | 3.807  |
| EPHA4    |                    |     |      | Inf     | Inf     | 3.782  |
| HOXB9    |                    |     |      | Inf     | Inf     | 2.918  |
| FLT1     |                    |     |      | Inf     | Inf     | 2.570  |
| CD40     |                    |     |      | Inf     | Inf     | 2.467  |
| NAP1L2   |                    |     |      | Inf     | Inf     | 2.279  |
| ADAMTS1  |                    |     |      | 4.462   | 3.335   | 2.108  |
| BMP4     |                    |     |      | Inf     | Inf     | 1.907  |
| SLC2A3   |                    |     |      | Inf     | Inf     | 1.843  |
| SIX1     |                    |     |      | Inf     | Inf     | 1.637  |
| CD55     |                    |     |      | Inf     | Inf     | 1.620  |
| HOXA-AS3 |                    |     |      | Inf     | Inf     | 1.586  |
| PDPN     |                    |     |      | Inf     | Inf     | 1.531  |
| IL15RA   |                    |     |      | Inf     | Inf     | 1.265  |
| NKX3-1   |                    |     |      | Inf     | Inf     | 1.143  |
| PCSK5    |                    |     |      | Inf     | Inf     | 1.085  |
| COL13A1  |                    |     |      | 11.298  | 9.843   | 0.894  |
| CSDA     |                    |     |      | Inf     | Inf     | 0.709  |
| CHCHD7   |                    |     |      | 4.019   | 3.746   | 0.648  |
| HOXA9    |                    |     |      | Inf     | Inf     | 0.645  |
| TNFAIP3  |                    |     |      | Inf     | Inf     | -0.736 |
| ARHGAP18 |                    |     |      | Inf     | Inf     | -0.880 |
| EPB41L3  |                    |     |      | Inf     | Inf     | -0.919 |
| CTGF     |                    |     |      | Inf     | Inf     | -0.974 |
| ENPP1    |                    |     |      | Inf     | Inf     | -1.008 |
| FBLN5    |                    |     |      | Inf     | Inf     | -1.072 |
| SYDE2    |                    |     |      | Inf     | Inf     | -1.530 |
| KLF4     |                    |     |      | Inf     | Inf     | -1.731 |
| TCF4     |                    |     |      | -3.500  | -4.480  | 0.715  |
| CD200    |                    |     |      | -Inf    | -Inf    | 2.829  |
| HDAC9    |                    |     |      | -10.342 | -10.051 | 1.603  |
| LIMCH1   |                    |     |      | -5.486  | -5.187  | 1.218  |
| MRVII    |                    |     |      | -8.250  | -Inf    | 1.064  |
| NRCAM    |                    |     |      | -5.610  | -4.665  | 0.987  |
| MALAT1   |                    |     |      | -3.060  | -2.642  | 0.762  |
| ZNF677   |                    |     |      | -Inf    | -Inf    | 0.619  |
| FSCN1    |                    |     |      | -2.665  | -3.442  | -0.628 |
| AKR1C1   |                    |     |      | -Inf    | -Inf    | -0.656 |
| S100A6   |                    |     |      | -Inf    | -Inf    | -0.684 |
| SORBS2   |                    |     |      | -4.114  | -4.426  | -0.685 |
| SLC43A3  |                    |     |      | -9.620  | -4.921  | -0.747 |
| PPP1R3C  |                    |     |      | -Inf    | -Inf    | -1.252 |
| RUNX1TI  |                    |     |      | -4.666  | -3.665  | -1.996 |
| CADM3    |                    |     |      | -Inf    | -Inf    | -2.108 |

Legend: Not Significant (black), Down-regulated (blue), Up-regulated (red). Scale: Fold change (log2) from <-6 to >6.

**C**

| GeneID   | Fold Change (log2) |     |      |        |        |        |
|----------|--------------------|-----|------|--------|--------|--------|
|          | GFP+               | RG+ | TIME | GFP+   | RG+    | TIME   |
| CPXM1    |                    |     |      | -Inf   |        | 5.973  |
| CEBPD    |                    |     |      | Inf    |        | 2.961  |
| RGL3     |                    |     |      | -8.163 |        | 1.921  |
| CYB561   |                    |     |      | -3.728 |        | 1.192  |
| STMN1    |                    |     |      | -2.466 |        | -0.600 |
| CAV1     |                    |     |      | Inf    |        | -0.608 |
| GYPC     |                    |     |      | Inf    |        | -0.670 |
| NES      |                    |     |      | -6.006 |        | -0.715 |
| MYEF2    |                    |     |      | -3.523 |        | -0.966 |
| ZNF704   |                    |     |      | -4.337 |        | -2.002 |
| CNR1     |                    |     |      | -Inf   |        | -2.251 |
| PDGFRB   |                    |     |      | -Inf   |        | -2.289 |
| MARCHF4  |                    |     |      | -Inf   |        | -2.542 |
| MYO1B    |                    |     |      |        | -2.551 | 1.574  |
| LIG2     |                    |     |      |        | Inf    | 3.441  |
| PCOLCE   |                    |     |      |        | -5.301 | 1.617  |
| ADAM22   |                    |     |      |        | -3.468 | 1.423  |
| SERPINA5 |                    |     |      |        | -Inf   | 1.316  |
| PTPRR    |                    |     |      |        | -Inf   | 1.033  |
| NLRC5    |                    |     |      |        | 3.893  | 0.888  |
| MYD88    |                    |     |      |        | -5.565 | 0.783  |
| PEAR1    |                    |     |      |        | -Inf   | -0.729 |
| SIMI     |                    |     |      |        | Inf    | -0.816 |
| FAM111B  |                    |     |      |        | -Inf   | -0.837 |
| DOCK10   |                    |     |      |        | -Inf   | -0.867 |
| CSRP1    |                    |     |      |        | -Inf   | -1.089 |
| APOBEC3B |                    |     |      |        | Inf    | -1.305 |

**Fig. S6**



**Table S1. List of oligonucleotide primers and probes**

| Target Gene                | ID      | Sequence (5'-3')                           |
|----------------------------|---------|--------------------------------------------|
| Primers                    |         |                                            |
| ORF 26 for PCR             | Forward | AGCCGAAAGATTCCACCAT                        |
|                            | Reverse | TCCGTGTTGTCTACGTCCAG                       |
| ORF 26 for dd PCR          | Forward | CGAATCCAACGGATTTGACCTC                     |
|                            | Reverse | CCCATAAATGACACATTGGTGGTA                   |
| LANA for PCR               | Forward | GGAAGAGCCCATAATCTTGC                       |
|                            | Reverse | GCCTCATAACGAACTCCAGGT                      |
| LANA for dd PCR            | Forward | AGCCACCGGTAAAGTAGGAC                       |
|                            | Reverse | GATGTGACCTTGGCGATGAC                       |
| $\beta$ -actin for PCR     | Forward | TTCTACAATGAGCTGCGTGT                       |
|                            | Reverse | GCCAGACAGCACTGTGTTGG                       |
| $\beta$ -globin for dd PCR | Forward | TCCACGTTACCTTGCCC                          |
|                            | Reverse | CAACCTCAAACAGACACCATGG                     |
| LANA for qPCR              | Forward | TGGATCTCGTCTTCATCCTTTCCC                   |
|                            | Reverse | CCAACAACCACCGGTCCCTT                       |
| ORF59 for qPCR             | Forward | GCCCACATCCACCGACTTC                        |
|                            | Reverse | AACACATGGTGTCAAATCAGG                      |
| GAPDH                      | Forward | GAGTCCACTGGCGTCTTCAC                       |
|                            | Reverse | ATGACGAACATGGGGGCATC                       |
| Probes                     |         |                                            |
| ORF 26 for qPCR            |         | 5'FAM/CCCATGGTCGTGCCGCAGCA/3'BHQ-1         |
| ORF 26 for dd PCR          |         | 5'FAM/CCATGGTCGTGCCGCACGCA/3'BHQ-1         |
| LANA for dd PCR            |         | 5'FAM/CATGTCGCCGACTCCGTCTGA/3'BHQ-1        |
| $\beta$ -globin for dd PCR |         | 5'HEX/CTCCTGAGGAGAAGTCTGCCGTTACTGCC/3'BHQ1 |

**Table S2. ATCC Report on SHSY5Y Verification**

| Test Results for Submitted Sample                                    |                       |    |  | ATCC Reference Database Profile                                |    |  |     |
|----------------------------------------------------------------------|-----------------------|----|--|----------------------------------------------------------------|----|--|-----|
| Locus                                                                | Query Profile: SHSY5Y |    |  | Database Profile: SH-SY5Y; Neuroblastoma; Human (Homo sapiens) |    |  |     |
| TH01                                                                 | 7                     | 10 |  | 7                                                              | 10 |  |     |
| D5S818                                                               | 12                    |    |  | 12                                                             |    |  |     |
| D13S317                                                              | 11                    |    |  | 11                                                             |    |  |     |
| D7S820                                                               | 7                     | 10 |  | 7                                                              | 10 |  |     |
| D16S539                                                              | 8                     | 13 |  | 8                                                              | 13 |  |     |
| CSF1PO                                                               | 11                    |    |  | 11                                                             |    |  |     |
| Amelogenin                                                           | X                     |    |  | X                                                              |    |  |     |
| vWA                                                                  | 14                    | 18 |  | 14                                                             | 18 |  |     |
| TPOX                                                                 | 8                     | 11 |  | 8                                                              | 11 |  |     |
| Number of shared alleles between query sample and database profile:  |                       |    |  |                                                                |    |  | 9   |
| Total number of alleles in the database profile:                     |                       |    |  |                                                                |    |  | 9   |
| Percent match between the submitted sample and the database profile: |                       |    |  |                                                                |    |  | 100 |

**Explanation of Test Results**

Cell lines with 80% match are considered to be related; i.e., derived from a common ancestry. Cell lines with between a 55% to 80% match require further profiling for authentication of relatedness.

**X**

The submitted profile is an exact match for the following ATCC human cell line(s) in the ATCC STR database (8 core loci plus Amelogenin): CRL-2266

**Additional Comments:**

Submitted sample, STRB5050 (SHSY5Y), is an exact match to ATCC cell line CRL-2266 (SH-SY5Y).
